# Supplementary material for: Modeling metabolism and stage-specific growth of Plasmodium falciparum HB3 during the intraerythrocytic developmental cycle
Source: Royal Society of Chemistry journal article supplement (doi:10.1039/c4mb00115j), 2014-07-01
Supplement: c4mb00115j2.pdf [file c4mb00115j2.pdf]

## Electronic Supplementary Information

### **Modeling metabolism and stage-specific growth of *Plasmodium falciparum* HB3 during the intraerythrocytic developmental cycle**

Xin Fang, Jaques Reifman,\* and Anders Wallqvist

**Supplemental Table S1: List of pyridoxal 5-phosphate-dependent enzymes in *Plasmodium falciparum*.**

The enzymes and related genes are listed by Kronenberger et al.<sup>38</sup> For each of these enzymes, we estimated the peak time of its abundance by adding the peak time of the related gene expression<sup>9</sup> and the time delay of proteomics data compared to the corresponding transcriptomics data<sup>36</sup> (see Experimental Section for the details of how to calculate the time delays). An enzyme is considered to be active during the ring, trophozoite, or schizont stage if its proteomics peak time is during 0–18, 18–30, or 30–48 hours, respectively.<sup>9</sup> EC-#, Enzyme Commission number.

| Index | EC-#     | Enzyme annotation                       | Gene     | Gene in metabolic network? <sup>16</sup> | Peak time in gene expression <sup>9</sup> (hour) | Time delay <sup>36</sup> | Estimated peak time for proteomics (hour) | Estimated stage |
|-------|----------|-----------------------------------------|----------|------------------------------------------|--------------------------------------------------|--------------------------|-------------------------------------------|-----------------|
| 1     | 2.1.2.1  | Serine hydroxymethyltransferase         | PFL1720w | Yes                                      | 30–35                                            | 11                       | 41–46                                     | Schizont        |
| 2     | 2.3.1.37 | ALA synthase (aminolevulinate synthase) | PFL2210w | Yes                                      | 15–20                                            | 11                       | 26–31                                     | Trophozoite     |
| 3     | 2.6.1.1  | Aspartate aminotransferase              | PFB0200c | Yes                                      | 10–20                                            | 11                       | 21–31                                     | Trophozoite     |
| 4     | 2.6.1.13 | Ornithine aminotransferase              | PFF0435w | Yes                                      | No data                                          | –                        | –                                         | –               |
| 5     | 2.6.1.57 | Aspartate aminotransferase              | PFB0200c | Yes                                      | 10–20                                            | 11                       | 21–31                                     | Trophozoite     |

|    |          |                                                                           |            |     |                                      |    |          |                      |
|----|----------|---------------------------------------------------------------------------|------------|-----|--------------------------------------|----|----------|----------------------|
| 6  | 4.1.1.17 | S-adenosylmethionine decarboxylase/ornithine decarboxylase (bifunctional) | PF10_0322  | Yes | 10–15                                | 8  | 18–23    | Trophozoite          |
| 7  | 4.1.3.38 | p-aminobenzoic acid synthetase, putative                                  | PFI1100w   | Yes | 20–25                                | 11 | 31–36    | Schizont             |
| 8  | 2.3.1.50 | Serine C-palmitoyltransferase                                             | PF14_0155  | Yes | No data                              | –  | –        | –                    |
| 9  | 2.6.1.42 | Conserved plasmodium protein                                              | PF14_0557  | Yes | 10–25                                | 11 | 21–31    | Trophozoite          |
| 10 | 2.8.1.7  | Cysteine desulfurase, putative                                            | PF07_0068  | Yes | 20–25                                | 11 | 31–36    | Schizont             |
| 11 | 2.8.1.7  | Cysteine desulfurase, putative                                            | MAL7P1.150 | Yes | three spots:<br>5–10<br>5–10<br>4–10 | 11 | 15/16–21 | Ring                 |
| 12 | 4.1.1.18 | Lysine decarboxylase, putative                                            | PFD0285c   | Yes | 15–25                                | 11 | 26–36    | Trophozoite-Schizont |
| 13 | 4.1.1.18 | Lysine decarboxylase, putative                                            | PFD0670c   | No  | 25–35                                | 11 | 36–46    | Schizont             |

**Supplemental Table S2: List of allowed metabolite uptakes and secretions in the metabolic network of *Plasmodium falciparum*.**

|                                  | Metabolites                                        | Literature evidence or rationale              |
|----------------------------------|----------------------------------------------------|-----------------------------------------------|
| <b>Uptake</b>                    | Glucose                                            | Ref. 58                                       |
|                                  | Hemoglobin                                         | Ref. 30                                       |
|                                  | Isoleucine                                         | Ref. 59                                       |
|                                  | Purine nucleobases and nucleosides                 | Ref. 60                                       |
|                                  | Choline                                            | Ref. 61                                       |
|                                  | Phosphate                                          | Ref. 62                                       |
|                                  | Pantothenate                                       | Ref. 63                                       |
|                                  | Nicotinamide                                       | Ref. 8                                        |
|                                  | Folate                                             | Ref. 64                                       |
|                                  | Iron                                               | Ref. 65                                       |
|                                  | Fatty acids                                        | Ref. 66                                       |
|                                  | Oxygen                                             | Ref. 67                                       |
|                                  | Riboflavin                                         | Ref. 69                                       |
|                                  | Thiamine                                           | Ref. 70                                       |
|                                  | Glycerol                                           | Ref. 68                                       |
| Sulfate                          | Added to avoid a zero biomass production rate      |                                               |
| H <sub>2</sub> O, H <sup>+</sup> | Assumed to be freely taken up                      |                                               |
| <b>Secretion</b>                 | Lactate                                            | Ref. 58                                       |
|                                  | Amino acids except isoleucine                      | Ref. 30                                       |
|                                  | Glutathione conjugates                             | Ref. 48                                       |
|                                  | Ornithine                                          | Ref. 8                                        |
|                                  | Formate                                            | Ref. 68                                       |
|                                  | Glycerol                                           | Ref. 68                                       |
|                                  | Urea                                               | Added to avoid a zero biomass production rate |
|                                  | H <sub>2</sub> O, H <sup>+</sup> , CO <sub>2</sub> | Assumed to be freely secreted                 |
